# Supplementary material for: CdS nanoparticles alleviate photo-induced stress in Geobacter co-cultures
Source: Royal Society of Chemistry journal article supplement (doi:10.1039/c9en00339h), 2019-01-01
Supplement: c9en00339h1.pdf [file c9en00339h1.pdf]

## Supporting Information

### **CdS nanoparticles alleviate photo-induced stress in *Geobacter* co-cultures**

Shanshan Chen, Chengsheng Deng, Xing Liu, Yuting Yang, Xixi Cai, Haibo Huang, Jian Lü,

Shungui Zhou\*

Fujian Provincial Key Laboratory of Soil Environmental Health and Regulation, College of  
Resources and Environment, Fujian Agriculture and Forestry University, Fuzhou 350002,  
China

Corresponding Author:

Shungui Zhou

E-mail: sgzhou@fafu.edu.cn

Tel/Fax: +86 591 86397843

ORCID iD: 0000-0003-0899-4225

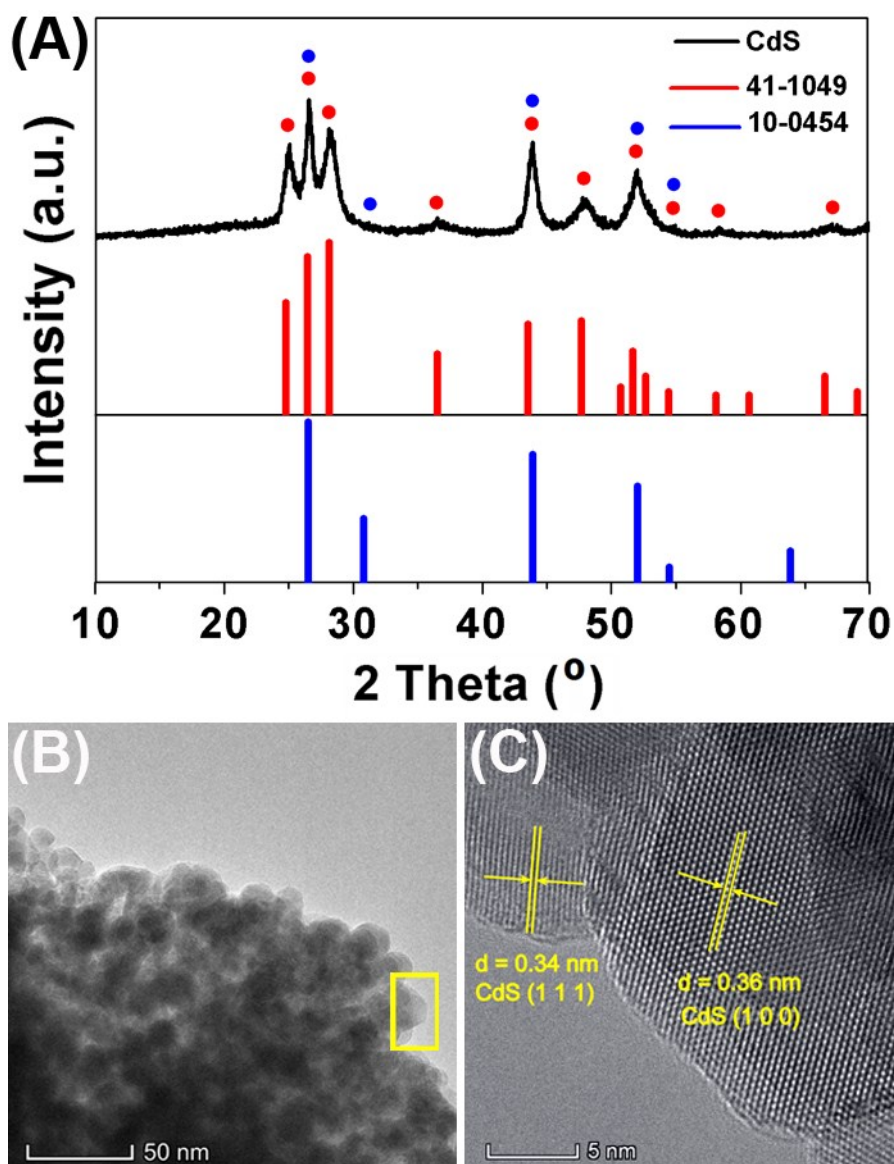

**Figure S1** (A) The PXRD pattern, (B) the TEM image and (C) the HR-TEM image of CdS NPs.

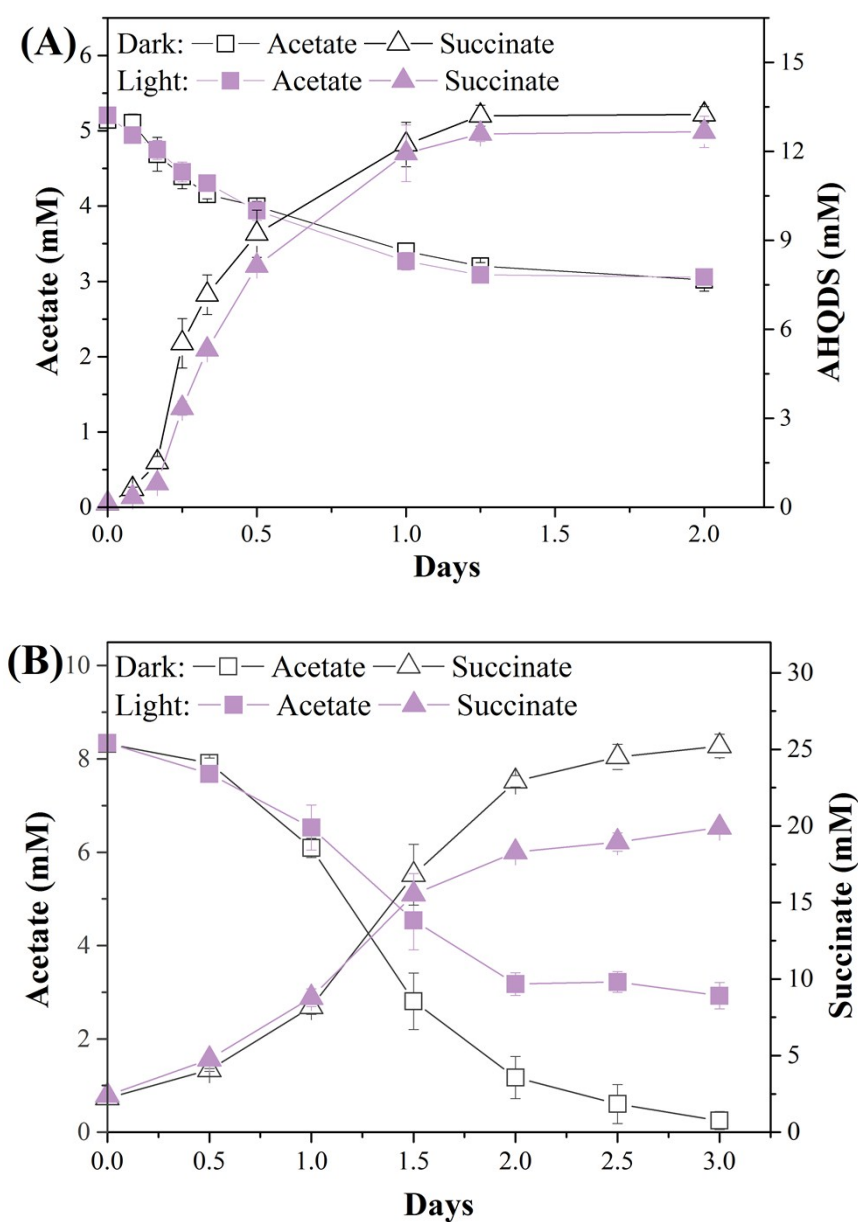

**Figure S2** Ethanol/acetate consumption and AHQDS/succinate production representing the growth of (A) *G. metallireducens* with ethanol as the electron donor and AQDS as the electron acceptor and (B) *G. sulfurreducens* with acetate as the electron donor and fumarate as the electron acceptor without CdS NPs. The results are the means  $\pm$  s.d. for triplicate cultures.

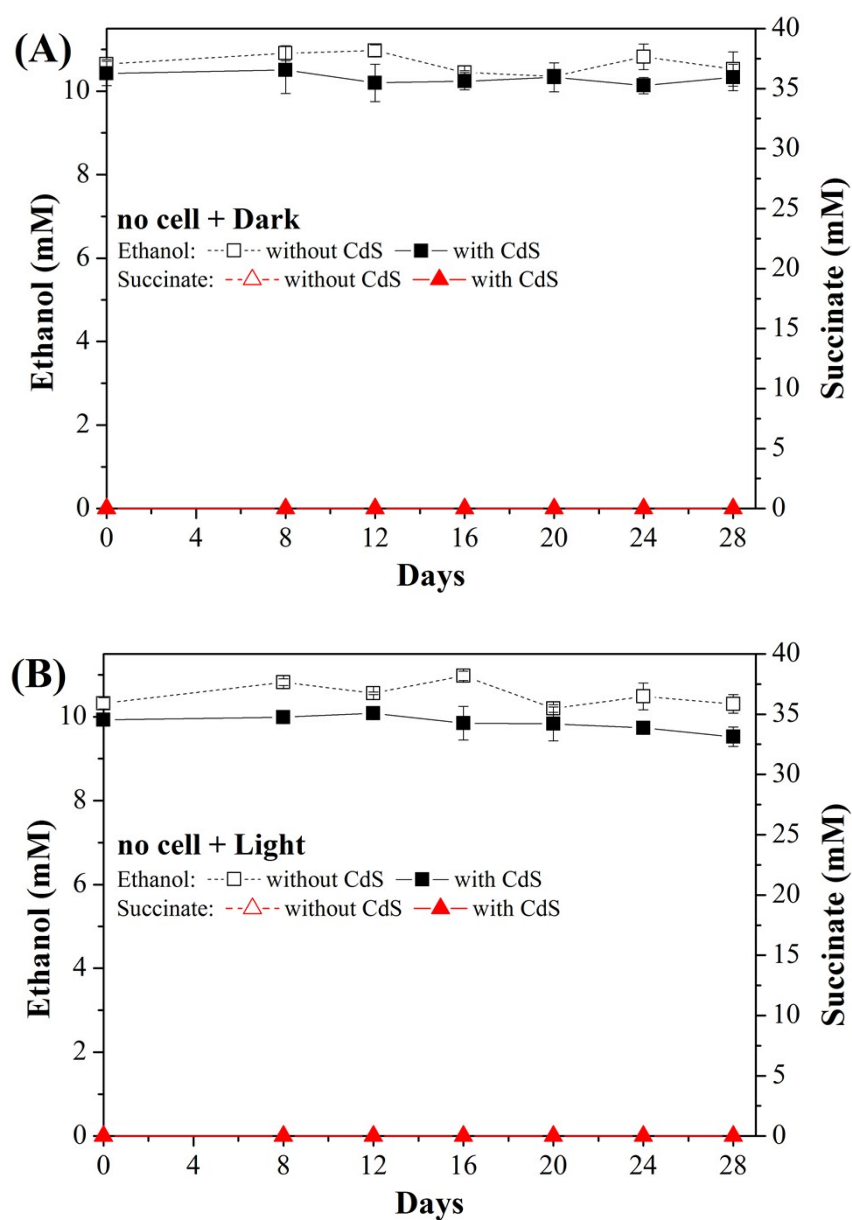

**Figure S3** Ethanol consumption and succinate production in the no-cell control groups in the (A) dark and (B) light conditions. The results are the means  $\pm$  s.d. for triplicate cultures.

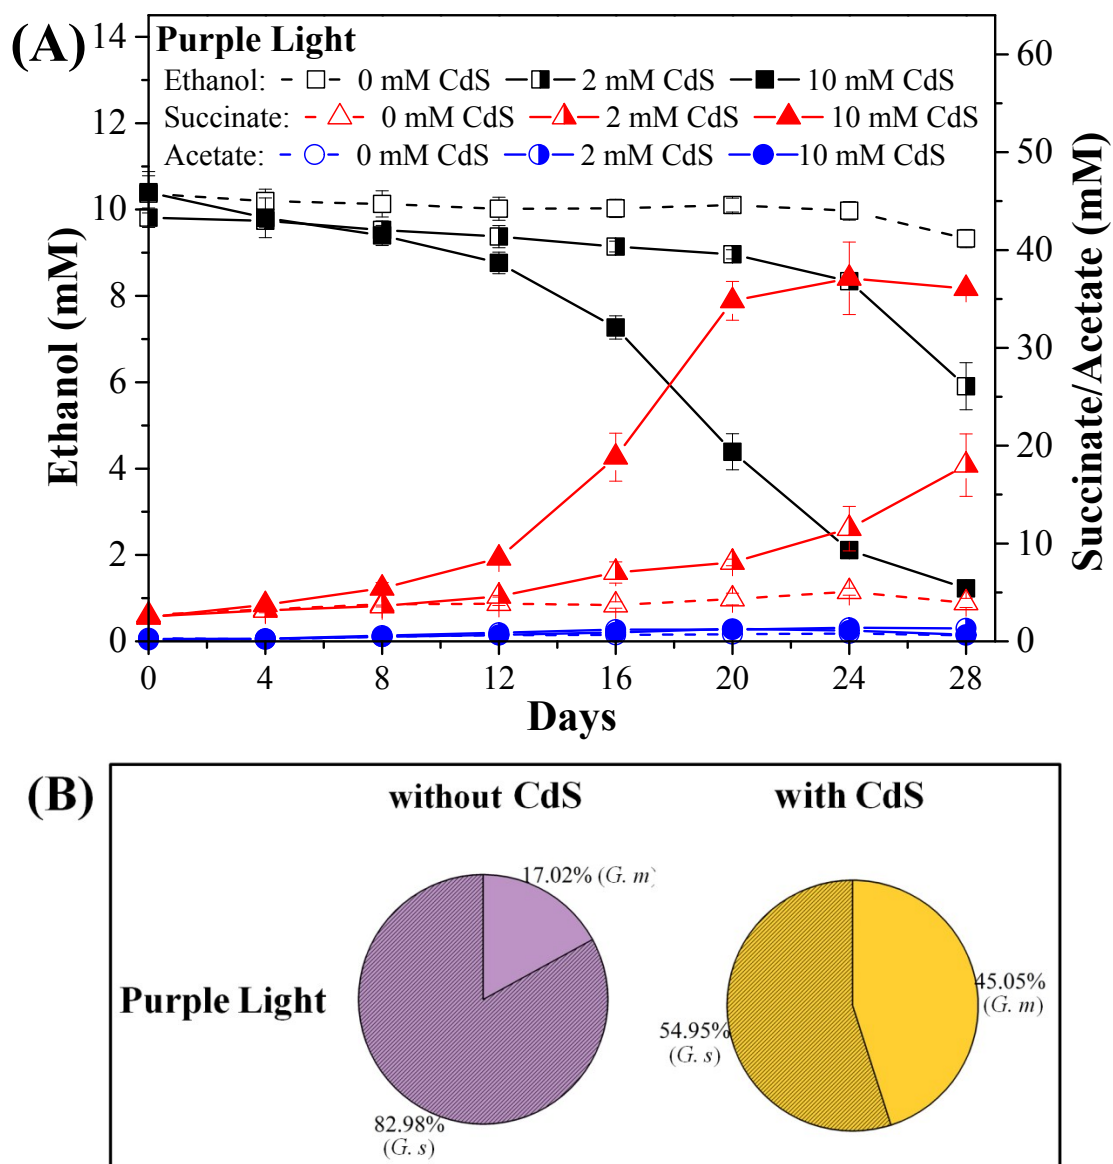

**Figure S4** (A) Ethanol consumption and succinate production and (B) percentages of *G. metallireducens* and *G. sulfurreducens* on day 28 in the purple light condition. The results are the means  $\pm$  s.d. for triplicate cocultures.

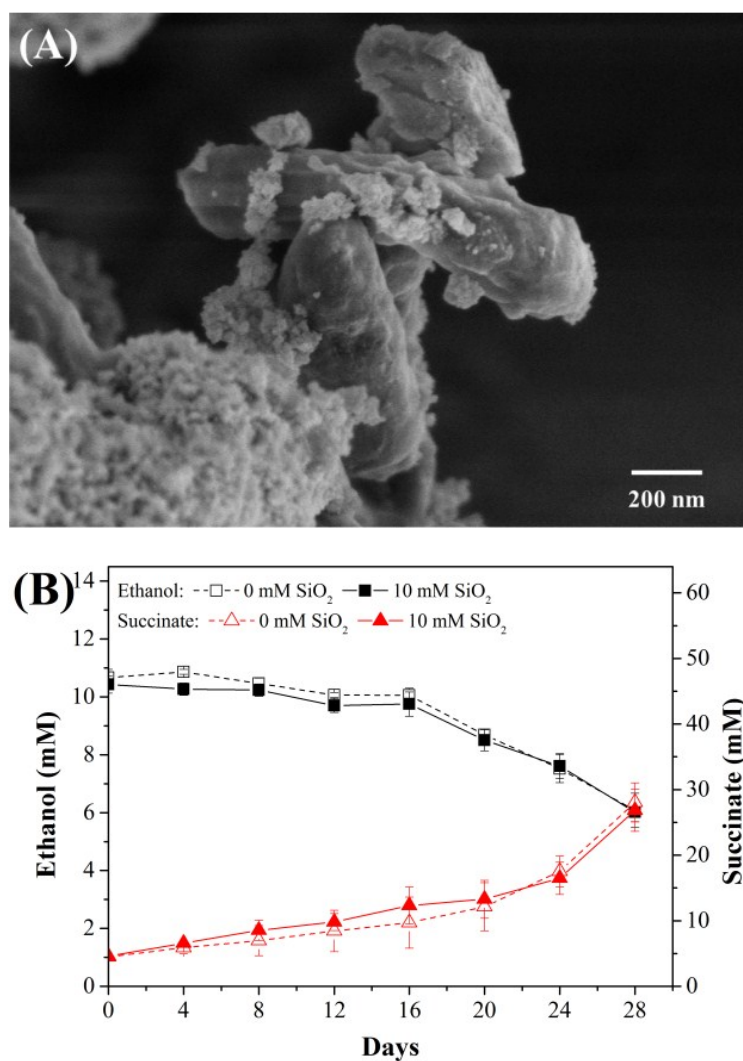

**Figure S5** (A) Scanning electron micrograph and (B) ethanol consumption and succinate production of the *Geobacter* co-cultures amended with SiO<sub>2</sub> NPs under visible light condition. The results are the means  $\pm$  s.d. for triplicate cocultures.

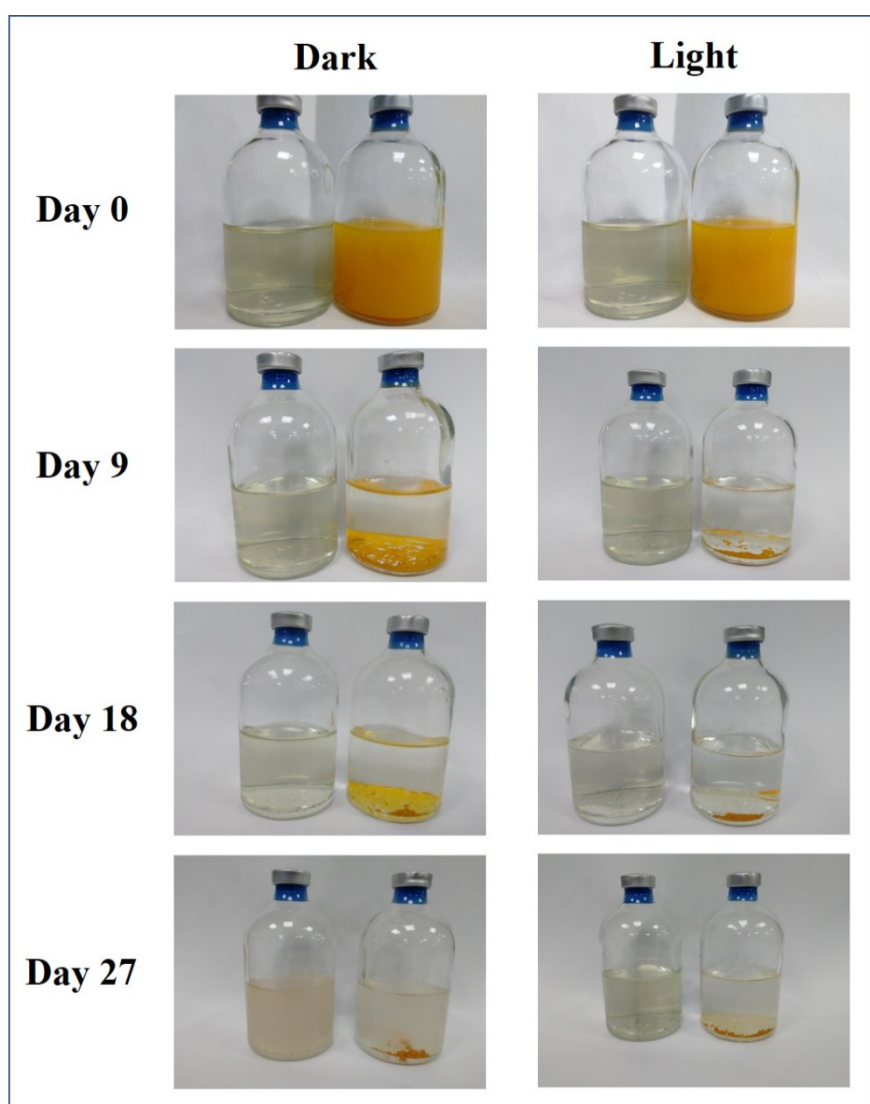

**Figure S6** Appearances of *Geobacter* co-cultures in the culture bottle.
